# Supplementary material for: Comprehensive integrated NGS-based surveillance and contact-network modeling unravels transmission dynamics of vancomycin-resistant enterococci in a high-risk population within a tertiary care hospital
Source: PLoS One. 2020 Jun 24;15(6):e0235160. doi: 10.1371/journal.pone.0235160 (PMC7314025; doi:10.1371/journal.pone.0235160)
Supplement: S2 Table — This table contains the supporting information about allele-distances of 111 isolates of the entire study collection from core genome MLST-based analyses using the SeqSphere+ software. (XLSX) [file pone.0235160.s002.xlsx]

## Sheet: Tabelle1
Table S2: Allele-distances of 111 isolates from core genome MLST-based analyses using the SeqSphere+ software.
	UW13690	UW13691	UW13692	UW13693	UW13694	UW13695	UW13696	UW13697	UW13698	UW13699	UW13700	UW13701	UW13702	UW13703	UW13704	UW13705	UW13706	UW13707	UW13708	UW13709	UW13710	UW13711	UW13712	UW13713	UW13714	UW13715	UW13716	UW13717	UW13718	UW13719	UW13720	UW13721	UW13722	UW13723	UW13724	UW13725	UW13726	UW13727	UW13728	UW13729	UW13730	UW13731	UW13732	UW13733	UW13734	UW13735	UW13736	UW13737	UW13738
UW13690		178	89	92	480	178	235	92	0	0	1088	0	237	0	237	0	300	1	237	237	1	1	307	89	211	229	234	0	336	0	0	0	0	170	0	0	2	233	2	2	2	2	2	0	2	71	363	0	2
UW13691	178		109	142	434	0	320	141	178	178	1089	178	322	178	322	178	319	177	321	323	176	178	321	120	270	288	319	178	377	178	178	178	178	200	178	178	178	319	178	178	178	178	177	178	178	155	328	178	178
UW13692	89	109		50	424	109	269	50	89	89	1033	89	271	89	271	89	327	88	271	271	89	89	333	9	207	198	269	89	345	89	89	89	89	107	89	89	89	268	89	89	89	89	89	89	89	57	335	89	89
UW13693	92	142	50		443	142	265	0	92	92	1086	92	267	92	267	92	329	90	267	267	91	91	335	49	244	202	264	92	346	92	92	92	92	133	92	92	91	263	91	91	91	91	91	92	91	57	351	92	91
UW13694	480	434	424	443		433	415	443	480	480	1078	480	416	479	417	480	360	477	415	418	481	481	351	448	465	425	414	480	518	479	480	480	480	448	480	480	480	414	481	480	480	480	481	479	481	449	350	479	481
UW13695	178	0	109	142	433		319	141	178	178	1087	178	321	178	321	178	318	177	320	322	176	178	320	120	270	288	318	178	376	178	178	178	178	200	178	178	178	318	178	178	178	178	177	178	178	155	327	178	178
UW13696	235	320	269	265	415	319		265	235	235	1053	235	3	235	3	235	181	232	3	2	234	234	228	282	186	293	1	235	377	235	235	235	235	229	235	235	232	2	234	233	233	233	234	235	234	243	296	234	234
UW13697	92	141	50	0	443	141	265		92	92	1083	92	267	92	267	92	328	90	267	267	91	91	334	49	244	202	264	92	346	92	92	92	92	133	92	92	91	263	91	91	91	91	91	92	91	57	350	92	91
UW13698	0	178	89	92	480	178	235	92		0	1087	0	237	0	237	0	300	1	237	237	1	1	307	89	211	229	234	0	336	0	0	0	0	170	0	0	2	233	2	2	2	2	2	0	2	71	363	0	2
UW13699	0	178	89	92	480	178	235	92	0		1088	0	237	0	237	0	300	1	237	237	1	1	307	89	211	229	234	0	336	0	0	0	0	170	0	0	2	233	2	2	2	2	2	0	2	71	363	0	2
UW13700	1088	1089	1033	1086	1078	1087	1053	1083	1087	1088		1087	1054	1084	1054	1088	1096	1085	1051	1054	1082	1088	1092	1092	1091	1104	1054	1087	1105	1086	1088	1087	1088	1066	1087	1087	1085	1053	1088	1079	1087	1086	1087	1086	1085	1085	1088	1086	1088
UW13701	0	178	89	92	480	178	235	92	0	0	1087		237	0	237	0	300	1	237	237	1	1	307	89	211	229	234	0	336	0	0	0	0	170	0	0	2	233	2	2	2	2	2	0	2	71	363	0	2
UW13702	237	322	271	267	416	321	3	267	237	237	1054	237		237	0	237	182	234	0	4	236	236	228	284	187	295	2	237	378	237	237	236	237	231	237	237	234	3	236	235	235	235	236	237	236	245	297	236	236
UW13703	0	178	89	92	479	178	235	92	0	0	1084	0	237		237	0	300	1	237	237	1	1	307	89	211	229	234	0	336	0	0	0	0	170	0	0	2	233	2	2	2	2	2	0	2	71	363	0	2
UW13704	237	322	271	267	417	321	3	267	237	237	1054	237	0	237		237	182	234	0	4	236	236	229	284	187	294	2	237	378	237	237	236	237	231	237	237	234	3	236	235	235	235	236	237	236	245	298	236	236
UW13705	0	178	89	92	480	178	235	92	0	0	1088	0	237	0	237		300	1	237	237	1	1	307	89	211	229	234	0	336	0	0	0	0	170	0	0	2	233	2	2	2	2	2	0	2	71	363	0	2
UW13706	300	319	327	329	360	318	181	328	300	300	1096	300	182	300	182	300		299	181	184	301	301	59	343	290	302	180	300	395	300	300	300	300	349	300	300	300	181	301	300	300	300	300	300	301	311	137	299	301
UW13707	1	177	88	90	477	177	232	90	1	1	1085	1	234	1	234	1	299		234	234	0	0	305	89	210	225	231	1	334	1	1	1	1	169	1	1	1	230	1	1	1	1	1	1	1	68	360	1	1
UW13708	237	321	271	267	415	320	3	267	237	237	1051	237	0	237	0	237	181	234		4	236	236	228	284	186	294	2	237	378	237	237	236	237	231	237	237	234	3	236	235	235	235	236	237	236	245	296	236	236
UW13709	237	323	271	267	418	322	2	267	237	237	1054	237	4	237	4	237	184	234	4		236	236	231	283	189	296	1	237	381	237	237	237	237	231	237	237	234	2	236	235	235	235	236	237	236	245	299	236	236
UW13710	1	176	89	91	481	176	234	91	1	1	1082	1	236	1	236	1	301	0	236	236		0	308	90	212	228	233	1	334	1	1	1	1	171	1	1	1	232	1	1	1	1	1	1	1	70	364	1	1
UW13711	1	178	89	91	481	178	234	91	1	1	1088	1	236	1	236	1	301	0	236	236	0		308	90	212	228	233	1	336	1	1	1	1	171	1	1	1	232	1	1	1	1	1	1	1	70	364	1	1
UW13712	307	321	333	335	351	320	228	334	307	307	1092	307	228	307	229	307	59	305	228	231	308	308		350	310	306	227	307	389	307	307	307	307	355	307	307	307	228	308	307	307	307	307	307	308	318	92	306	308
UW13713	89	120	9	49	448	120	282	49	89	89	1092	89	284	89	284	89	343	89	284	283	90	90	350		218	205	281	89	363	89	89	89	89	109	89	89	90	280	90	90	90	90	90	89	90	57	357	89	90
UW13714	211	270	207	244	465	270	186	244	211	211	1091	211	187	211	187	211	290	210	186	189	212	212	310	218		266	185	211	330	211	211	211	211	184	211	211	210	185	212	211	212	211	212	211	212	219	349	211	212
UW13715	229	288	198	202	425	288	293	202	229	229	1104	229	295	229	294	229	302	225	294	296	228	228	306	205	266		292	229	315	229	229	229	229	192	229	229	227	292	228	228	227	228	228	229	228	192	316	228	228
UW13716	234	319	269	264	414	318	1	264	234	234	1054	234	2	234	2	234	180	231	2	1	233	233	227	281	185	292		234	376	234	234	234	234	228	234	234	231	1	233	232	232	232	233	234	233	242	295	233	233
UW13717	0	178	89	92	480	178	235	92	0	0	1087	0	237	0	237	0	300	1	237	237	1	1	307	89	211	229	234		335	0	0	0	0	170	0	0	2	233	2	2	2	2	2	0	2	71	362	0	2
UW13718	336	377	345	346	518	376	377	346	336	336	1105	336	378	336	378	336	395	334	378	381	334	336	389	363	330	315	376	335		335	336	335	336	362	336	335	335	376	336	335	335	335	336	336	336	336	429	335	336
UW13719	0	178	89	92	479	178	235	92	0	0	1086	0	237	0	237	0	300	1	237	237	1	1	307	89	211	229	234	0	335		0	0	0	170	0	0	2	233	2	2	2	2	2	0	2	71	363	0	2
UW13720	0	178	89	92	480	178	235	92	0	0	1088	0	237	0	237	0	300	1	237	237	1	1	307	89	211	229	234	0	336	0		0	0	170	0	0	2	233	2	2	2	2	2	0	2	71	363	0	2
UW13721	0	178	89	92	480	178	235	92	0	0	1087	0	236	0	236	0	300	1	236	237	1	1	307	89	211	229	234	0	335	0	0		0	170	0	0	2	233	2	2	2	2	2	0	2	71	363	0	2
UW13722	0	178	89	92	480	178	235	92	0	0	1088	0	237	0	237	0	300	1	237	237	1	1	307	89	211	229	234	0	336	0	0	0		170	0	0	2	233	2	2	2	2	2	0	2	71	363	0	2
UW13723	170	200	107	133	448	200	229	133	170	170	1066	170	231	170	231	170	349	169	231	231	171	171	355	109	184	192	228	170	362	170	170	170	170		170	170	170	227	171	171	171	171	171	170	171	140	360	170	171
UW13724	0	178	89	92	480	178	235	92	0	0	1087	0	237	0	237	0	300	1	237	237	1	1	307	89	211	229	234	0	336	0	0	0	0	170		0	2	233	2	2	2	2	2	0	2	71	363	0	2
UW13725	0	178	89	92	480	178	235	92	0	0	1087	0	237	0	237	0	300	1	237	237	1	1	307	89	211	229	234	0	335	0	0	0	0	170	0		2	233	2	2	2	2	2	0	2	71	363	0	2
UW13726	2	178	89	91	480	178	232	91	2	2	1085	2	234	2	234	2	300	1	234	234	1	1	307	90	210	227	231	2	335	2	2	2	2	170	2	2		230	0	0	0	0	0	2	0	70	363	2	0
UW13727	233	319	268	263	414	318	2	263	233	233	1053	233	3	233	3	233	181	230	3	2	232	232	228	280	185	292	1	233	376	233	233	233	233	227	233	233	230		232	231	231	231	232	233	232	241	296	232	232
UW13728	2	178	89	91	481	178	234	91	2	2	1088	2	236	2	236	2	301	1	236	236	1	1	308	90	212	228	233	2	336	2	2	2	2	171	2	2	0	232		0	0	0	0	2	0	70	364	2	0
UW13729	2	178	89	91	480	178	233	91	2	2	1079	2	235	2	235	2	300	1	235	235	1	1	307	90	211	228	232	2	335	2	2	2	2	171	2	2	0	231	0		0	0	0	2	0	70	361	2	0
UW13730	2	178	89	91	480	178	233	91	2	2	1087	2	235	2	235	2	300	1	235	235	1	1	307	90	212	227	232	2	335	2	2	2	2	171	2	2	0	231	0	0		0	0	2	0	69	363	2	0
UW13731	2	178	89	91	480	178	233	91	2	2	1086	2	235	2	235	2	300	1	235	235	1	1	307	90	211	228	232	2	335	2	2	2	2	171	2	2	0	231	0	0	0		0	2	0	70	363	2	0
UW13732	2	177	89	91	481	177	234	91	2	2	1087	2	236	2	236	2	300	1	236	236	1	1	307	90	212	228	233	2	336	2	2	2	2	171	2	2	0	232	0	0	0	0		2	0	70	363	2	0
UW13733	0	178	89	92	479	178	235	92	0	0	1086	0	237	0	237	0	300	1	237	237	1	1	307	89	211	229	234	0	336	0	0	0	0	170	0	0	2	233	2	2	2	2	2		2	71	363	0	2
UW13734	2	178	89	91	481	178	234	91	2	2	1085	2	236	2	236	2	301	1	236	236	1	1	308	90	212	228	233	2	336	2	2	2	2	171	2	2	0	232	0	0	0	0	0	2		70	364	2	0
UW13735	71	155	57	57	449	155	243	57	71	71	1085	71	245	71	245	71	311	68	245	245	70	70	318	57	219	192	242	71	336	71	71	71	71	140	71	71	70	241	70	70	69	70	70	71	70		343	70	70
UW13736	363	328	335	351	350	327	296	350	363	363	1088	363	297	363	298	363	137	360	296	299	364	364	92	357	349	316	295	362	429	363	363	363	363	360	363	363	363	296	364	361	363	363	363	363	364	343		362	364
UW13737	0	178	89	92	479	178	234	92	0	0	1086	0	236	0	236	0	299	1	236	236	1	1	306	89	211	228	233	0	335	0	0	0	0	170	0	0	2	232	2	2	2	2	2	0	2	70	362		2
UW13738	2	178	89	91	481	178	234	91	2	2	1088	2	236	2	236	2	301	1	236	236	1	1	308	90	212	228	233	2	336	2	2	2	2	171	2	2	0	232	0	0	0	0	0	2	0	70	364	2
UW13739	0	178	89	92	480	178	235	92	0	0	1088	0	237	0	237	0	300	1	237	237	1	1	307	89	211	229	234	0	336	0	0	0	0	170	0	0	2	233	2	2	2	2	2	0	2	71	363	0	2
UW13740	240	327	276	272	420	326	13	272	240	240	1054	240	14	240	14	240	189	239	14	13	241	241	232	288	191	299	12	240	383	240	240	240	240	235	240	240	239	13	241	240	240	240	241	240	241	251	300	239	241
UW13741	5	175	92	97	478	175	235	97	5	5	1088	5	237	5	237	5	300	6	237	237	6	6	304	93	210	234	234	5	338	5	5	5	5	175	5	5	7	233	7	7	7	7	7	5	7	76	360	5	7
UW13742	5	175	92	97	478	175	235	97	5	5	1086	5	237	5	237	5	300	6	237	237	6	6	304	93	210	234	234	5	338	5	5	5	5	175	5	5	7	233	7	7	7	7	7	5	7	76	360	5	7
UW13744	249	309	214	229	457	309	322	229	249	249	1091	249	323	249	323	249	377	246	323	325	249	250	370	224	283	260	321	249	422	248	249	249	249	242	249	249	249	321	250	248	249	249	250	249	250	226	387	248	250
UW13745	0	178	89	92	480	178	235	92	0	0	1088	0	237	0	237	0	300	1	237	237	1	1	307	89	211	229	234	0	336	0	0	0	0	170	0	0	2	233	2	2	2	2	2	0	2	71	363	0	2
UW13746	3	175	89	90	476	175	233	90	3	3	1082	3	235	3	235	3	297	4	235	235	4	4	303	89	208	230	232	3	334	3	3	3	3	171	3	3	5	231	5	5	5	5	5	3	5	71	360	3	5
UW13747	0	178	89	92	480	178	235	92	0	0	1088	0	237	0	237	0	300	1	237	237	1	1	307	89	211	229	234	0	336	0	0	0	0	170	0	0	2	233	2	2	2	2	2	0	2	71	363	0	2
UW13748	0	178	89	92	480	178	235	92	0	0	1087	0	237	0	237	0	300	1	237	237	1	1	307	89	211	229	234	0	336	0	0	0	0	170	0	0	2	233	2	2	2	2	2	0	2	71	363	0	2
UW13749	0	178	89	92	480	178	235	92	0	0	1088	0	237	0	237	0	300	1	237	237	1	1	307	89	211	229	234	0	336	0	0	0	0	170	0	0	2	233	2	2	2	2	2	0	2	71	363	0	2
UW13750	239	322	272	267	417	321	7	267	239	239	1053	239	8	239	8	239	186	236	8	7	238	238	233	284	189	295	6	239	381	239	239	239	239	231	239	239	236	7	238	237	237	237	238	239	238	246	300	238	238
UW13751	83	128	34	34	445	128	272	34	83	83	1096	83	274	83	274	83	334	81	274	274	82	82	340	33	229	195	271	83	355	83	83	83	83	119	83	83	82	270	82	82	82	82	82	83	82	46	347	83	82
UW13752	0	166	84	89	456	166	222	89	0	0	1032	0	224	0	224	0	283	1	224	224	1	1	288	83	198	219	221	0	321	0	0	0	0	159	0	0	2	220	2	2	2	2	2	0	2	68	344	0	2
UW13753	0	178	89	92	480	178	235	92	0	0	1088	0	237	0	237	0	300	1	237	237	1	1	307	89	211	229	234	0	336	0	0	0	0	170	0	0	2	233	2	2	2	2	2	0	2	71	363	0	2
UW13754	234	318	269	265	439	318	41	265	234	234	1052	234	43	234	43	234	217	233	43	41	235	235	248	279	180	301	40	234	383	234	234	234	234	227	234	234	233	41	235	234	234	235	235	234	235	243	313	233	235
UW13755	0	178	89	92	480	178	235	92	0	0	1088	0	237	0	237	0	300	1	237	237	1	1	307	89	211	229	234	0	336	0	0	0	0	170	0	0	2	233	2	2	2	2	2	0	2	71	363	0	2
UW13756	2	166	85	85	445	166	214	85	2	2	1017	2	215	2	215	2	279	3	215	215	3	3	281	83	192	206	213	2	308	2	2	2	2	156	2	2	3	212	3	3	3	3	3	2	3	66	331	2	3
UW13757	0	178	89	92	480	178	235	92	0	0	1088	0	237	0	237	0	300	1	237	237	1	1	307	89	211	229	234	0	336	0	0	0	0	170	0	0	2	233	2	2	2	2	2	0	2	71	363	0	2
UW13758	2	178	89	91	481	178	234	91	2	2	1088	2	236	2	236	2	301	1	236	236	1	1	308	90	212	228	233	2	336	2	2	2	2	171	2	2	0	232	0	0	0	0	0	2	0	70	364	2	0
UW13759	237	321	272	268	440	321	43	268	237	237	1054	237	45	237	45	237	218	236	45	43	238	238	249	282	183	303	42	237	385	237	237	237	237	230	237	237	236	43	238	237	237	237	238	237	238	246	314	236	238
UW13760	82	127	33	33	444	127	271	33	82	82	1096	82	273	82	273	82	333	80	273	273	81	81	339	32	228	194	270	82	354	82	82	82	82	118	82	82	81	269	81	81	81	81	81	82	81	45	346	82	81
UW13761	1	179	89	93	481	179	236	93	1	1	1088	1	238	1	238	1	301	2	238	237	2	2	308	89	212	229	235	1	337	1	1	1	1	171	1	1	3	234	3	3	3	3	3	1	3	72	364	1	3
UW13762	0	178	89	92	480	178	235	92	0	0	1088	0	237	0	237	0	300	1	237	237	1	1	307	89	211	229	234	0	336	0	0	0	0	170	0	0	2	233	2	2	2	2	2	0	2	71	363	0	2
UW13763	282	353	290	292	502	353	245	292	282	282	1028	282	246	282	245	282	342	280	246	248	281	281	359	303	209	299	244	282	373	281	282	281	282	257	282	282	279	244	281	279	281	279	281	282	281	291	398	282	281
UW13764	375	394	360	368	377	393	352	367	375	375	1081	375	354	375	355	375	290	372	354	357	376	376	284	378	397	356	352	375	473	373	375	375	375	381	375	375	375	353	376	376	375	375	376	374	376	354	307	374	376
UW13765	0	177	88	91	479	177	234	91	0	0	1084	0	236	0	236	0	299	1	236	236	1	1	306	88	210	227	233	0	334	0	0	0	0	169	0	0	2	232	2	2	2	2	2	0	2	70	362	0	2
UW13766	1	179	90	93	480	179	235	93	1	1	1087	1	237	1	237	1	300	2	237	237	2	2	308	90	212	230	234	1	336	1	1	1	1	171	1	1	3	233	3	3	3	3	3	1	3	72	363	1	3
UW13767	84	130	35	36	442	130	275	36	84	84	1092	84	277	84	277	84	335	84	277	277	85	85	341	34	230	197	274	84	353	84	84	84	84	121	84	84	85	273	85	85	85	85	85	84	85	48	345	84	85
UW13768	0	177	89	91	478	177	233	91	0	0	1085	0	235	0	235	0	297	1	235	235	1	1	304	88	209	227	232	0	334	0	0	0	0	170	0	0	1	231	1	1	1	1	1	0	1	70	360	0	1
UW13769	354	308	308	319	266	307	300	318	354	354	1097	354	302	354	302	354	239	352	301	304	355	355	231	330	343	299	299	353	357	353	354	353	354	330	354	353	354	299	355	355	354	354	354	354	355	323	242	353	355
UW13770	1	178	89	91	480	178	234	91	1	1	1085	1	236	1	236	1	301	0	236	236	0	0	307	90	211	228	233	1	335	1	1	1	1	171	1	1	1	232	1	1	1	1	1	1	1	70	363	1	1
UW13771	0	178	89	92	480	178	235	92	0	0	1087	0	237	0	237	0	300	1	237	237	1	1	307	89	211	229	234	0	335	0	0	0	0	170	0	0	2	233	2	2	2	2	2	0	2	71	363	0	2
UW13772	366	344	318	330	294	344	337	329	366	366	1100	366	339	366	339	366	277	363	337	340	364	365	265	341	379	304	336	366	404	365	366	366	366	337	366	366	364	336	365	362	364	364	364	366	365	333	260	365	365
UW13773	3	179	90	92	481	179	234	92	3	3	1085	3	236	3	236	3	301	2	236	236	2	2	308	91	213	229	233	3	336	3	3	3	3	172	3	3	1	232	1	0	1	1	1	3	1	71	364	3	1
UW13774	188	325	229	239	442	325	273	239	188	188	1103	188	275	188	274	188	240	188	275	276	189	189	233	237	255	182	272	188	306	188	188	188	188	226	188	188	189	272	190	190	189	190	190	188	190	210	298	187	190
UW13775	3	179	90	92	481	179	234	92	3	3	1088	3	236	3	236	3	301	2	236	236	2	2	309	91	212	229	233	3	336	3	3	3	3	172	3	3	3	232	3	3	3	3	3	3	3	71	365	3	3
UW13776	0	178	89	92	480	178	235	92	0	0	1087	0	237	0	237	0	300	1	237	237	1	1	307	89	211	229	234	0	335	0	0	0	0	170	0	0	2	233	2	2	2	2	2	0	2	71	363	0	2
UW13777	176	7	108	141	432	7	319	140	176	176	1090	176	321	176	321	176	318	175	320	322	174	176	321	119	269	288	318	176	376	176	176	176	176	200	176	176	176	318	176	176	176	176	175	176	176	154	328	176	176
UW13778	3	179	90	92	481	179	234	92	3	3	1088	3	236	3	236	3	301	2	236	236	2	2	309	91	212	229	233	3	336	3	3	3	3	172	3	3	3	232	3	3	3	3	3	3	3	71	365	3	3
UW13779	0	177	88	91	477	177	234	91	0	0	1085	0	236	0	236	0	299	1	236	236	1	1	305	88	209	227	233	0	334	0	0	0	0	169	0	0	2	232	2	2	2	2	2	0	2	70	361	0	2
UW13780	3	179	90	92	481	179	234	92	3	3	1088	3	236	3	236	3	301	2	236	236	2	2	309	91	212	229	233	3	336	3	3	3	3	172	3	3	3	232	3	3	3	3	3	3	3	71	365	3	3
UW13781	326	355	290	292	511	355	277	292	326	326	1092	326	278	326	277	326	379	323	278	280	325	325	395	306	240	297	276	326	406	325	326	325	326	254	326	326	323	276	325	323	325	323	325	326	325	293	417	326	325
UW13782	3	179	90	92	482	179	235	92	3	3	1088	3	237	3	237	3	302	2	237	237	2	2	309	91	213	229	234	3	337	3	3	3	3	172	3	3	1	233	1	1	1	1	1	3	1	71	365	3	1
UW13783	2	178	90	91	480	178	235	91	2	2	1085	2	237	2	237	2	301	1	237	237	1	1	308	91	213	229	234	2	337	2	2	2	2	172	2	2	2	233	2	2	2	2	2	2	2	71	362	2	2
UW13784	3	179	90	92	481	179	234	92	3	3	1087	3	236	3	236	3	301	2	236	236	2	2	309	91	212	229	233	3	336	3	3	3	3	172	3	3	3	232	3	3	3	3	3	3	3	71	365	3	3
UW13785	0	178	89	92	480	178	235	92	0	0	1087	0	237	0	237	0	300	1	237	237	1	1	307	89	211	229	234	0	335	0	0	0	0	170	0	0	2	233	2	2	2	2	2	0	2	71	363	0	2
UW13786	1	179	89	93	481	179	236	93	1	1	1087	1	238	1	238	1	301	2	238	237	2	2	308	89	212	229	235	1	336	1	1	1	1	171	1	1	3	234	3	3	3	3	3	1	3	72	364	1	3
UW13787	1030	1031	977	1029	1085	1029	1009	1026	1028	1030	519	1029	1009	1026	1010	1030	1039	1026	1005	1011	1024	1030	1037	1033	1035	1055	1010	1030	1039	1028	1030	1029	1030	1024	1029	1030	1027	1009	1030	1022	1029	1028	1029	1028	1028	1026	1036	1027	1030
UW13788	5	175	92	97	478	175	235	97	5	5	1088	5	237	5	237	5	300	6	237	237	6	6	304	93	210	234	234	5	338	5	5	5	5	175	5	5	7	233	7	7	7	7	7	5	7	76	360	5	7
UW13789	2	180	91	94	481	180	237	94	2	2	1085	2	239	2	239	2	302	3	239	239	3	3	309	91	213	231	236	2	338	2	2	2	2	172	2	2	4	235	4	4	4	4	4	2	4	73	365	2	4
UW13790	1	179	90	93	480	179	236	93	1	1	1088	1	238	1	238	1	301	2	238	238	2	2	308	90	212	230	235	1	337	1	1	1	1	171	1	1	3	234	3	3	3	3	3	1	3	72	364	1	3
UW13791	1	179	90	93	480	179	235	93	1	1	1088	1	237	1	237	1	300	2	237	237	2	2	307	90	212	230	234	1	336	1	1	1	1	171	1	1	3	233	3	3	3	3	3	1	3	72	363	1	3
UW13792	83	125	35	34	440	125	274	34	83	83	1088	83	275	83	275	83	329	83	275	275	84	84	336	34	229	197	273	83	352	83	83	83	83	120	83	83	84	272	84	84	84	84	84	83	84	49	342	83	84
UW13793	0	178	89	92	480	178	235	92	0	0	1088	0	237	0	237	0	300	1	237	237	1	1	307	89	211	229	234	0	336	0	0	0	0	170	0	0	2	233	2	2	2	2	2	0	2	71	363	0	2
UW13794	1	179	90	93	479	179	235	93	1	1	1087	1	237	1	237	1	300	2	237	237	2	2	307	90	212	230	234	1	336	1	1	1	1	171	1	1	3	233	3	3	3	3	3	1	3	72	363	1	3
UW13795	2	180	91	94	481	180	237	94	2	2	1087	2	239	2	239	2	302	3	239	239	3	3	309	91	213	231	236	2	337	2	2	2	2	172	2	2	4	235	4	4	4	4	4	2	4	73	365	2	4
UW13796	1	179	90	93	480	179	235	93	1	1	1088	1	237	1	237	1	300	2	237	237	2	2	307	90	212	230	234	1	336	1	1	1	1	171	1	1	3	233	3	3	3	3	3	1	3	72	363	1	3
UW13797	5	112	23	23	417	112	211	23	5	5	1026	5	213	5	213	5	274	5	213	213	5	5	280	21	176	168	210	5	298	5	5	5	5	106	5	5	5	209	5	5	5	5	5	5	5	16	309	5	5
UW13798	3	174	89	92	465	174	227	92	3	3	1045	3	227	3	227	3	289	4	227	228	4	4	295	87	202	218	226	3	322	3	3	3	3	166	3	3	4	225	4	4	4	4	4	3	4	69	349	3	4
UW13799	82	127	33	33	444	127	271	33	82	82	1096	82	273	82	273	82	333	80	273	273	81	81	339	32	228	194	270	82	354	82	82	82	82	118	82	82	81	269	81	81	81	81	81	82	81	45	346	82	81
UW13800	81	127	33	33	440	127	264	33	81	81	1088	81	266	81	266	81	326	79	266	266	80	80	333	32	223	191	263	81	347	81	81	81	81	115	81	81	80	262	80	80	80	80	80	81	80	44	340	81	80
UW13801	82	128	34	34	445	128	271	34	82	82	1096	82	273	82	273	82	333	80	273	273	81	81	339	33	228	195	270	82	354	82	82	82	82	119	82	82	81	269	81	81	81	81	81	82	81	46	346	82	81
[truncated: 62 more columns]
